# Supplementary material for: Whole-Genome Sequencing of Staphylococcus aureus and Staphylococcus haemolyticus Clinical Isolates from Egypt
Source: PubMed Central journal article supplement (PMC9431571; doi:10.1128/spectrum.02413-21), 2022-06-21
Supplement: spectrum.02413-21-s0001.pdf [file spectrum.02413-21-s0001.pdf]

***Phylogenomic study of Staphylococcus aureus and  
Staphylococcus haemolyticus clinical isolates from Egypt***

Cesar Montelongo, Carine R. Mores, Catherine Putonti, Alan J. Wolfe, Alaa Abouelfetouh

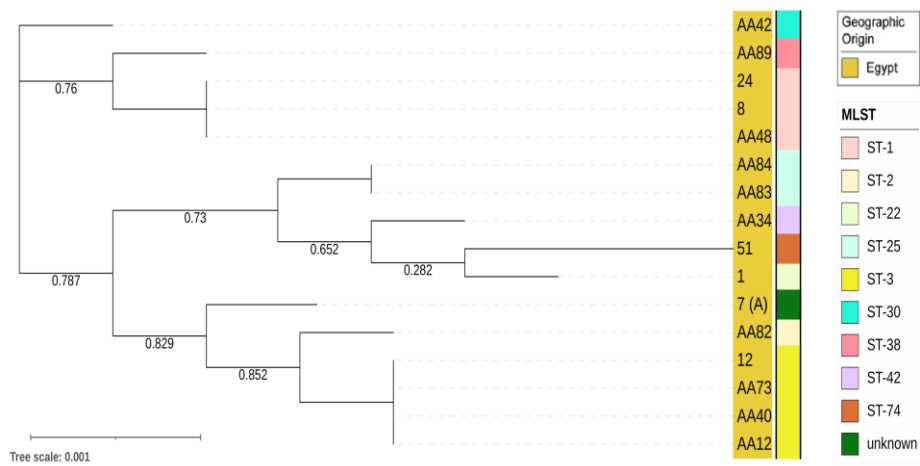

**Figure S1. MLST tree of *S. haemolyticus* annotated by geographic origin and MLST.**

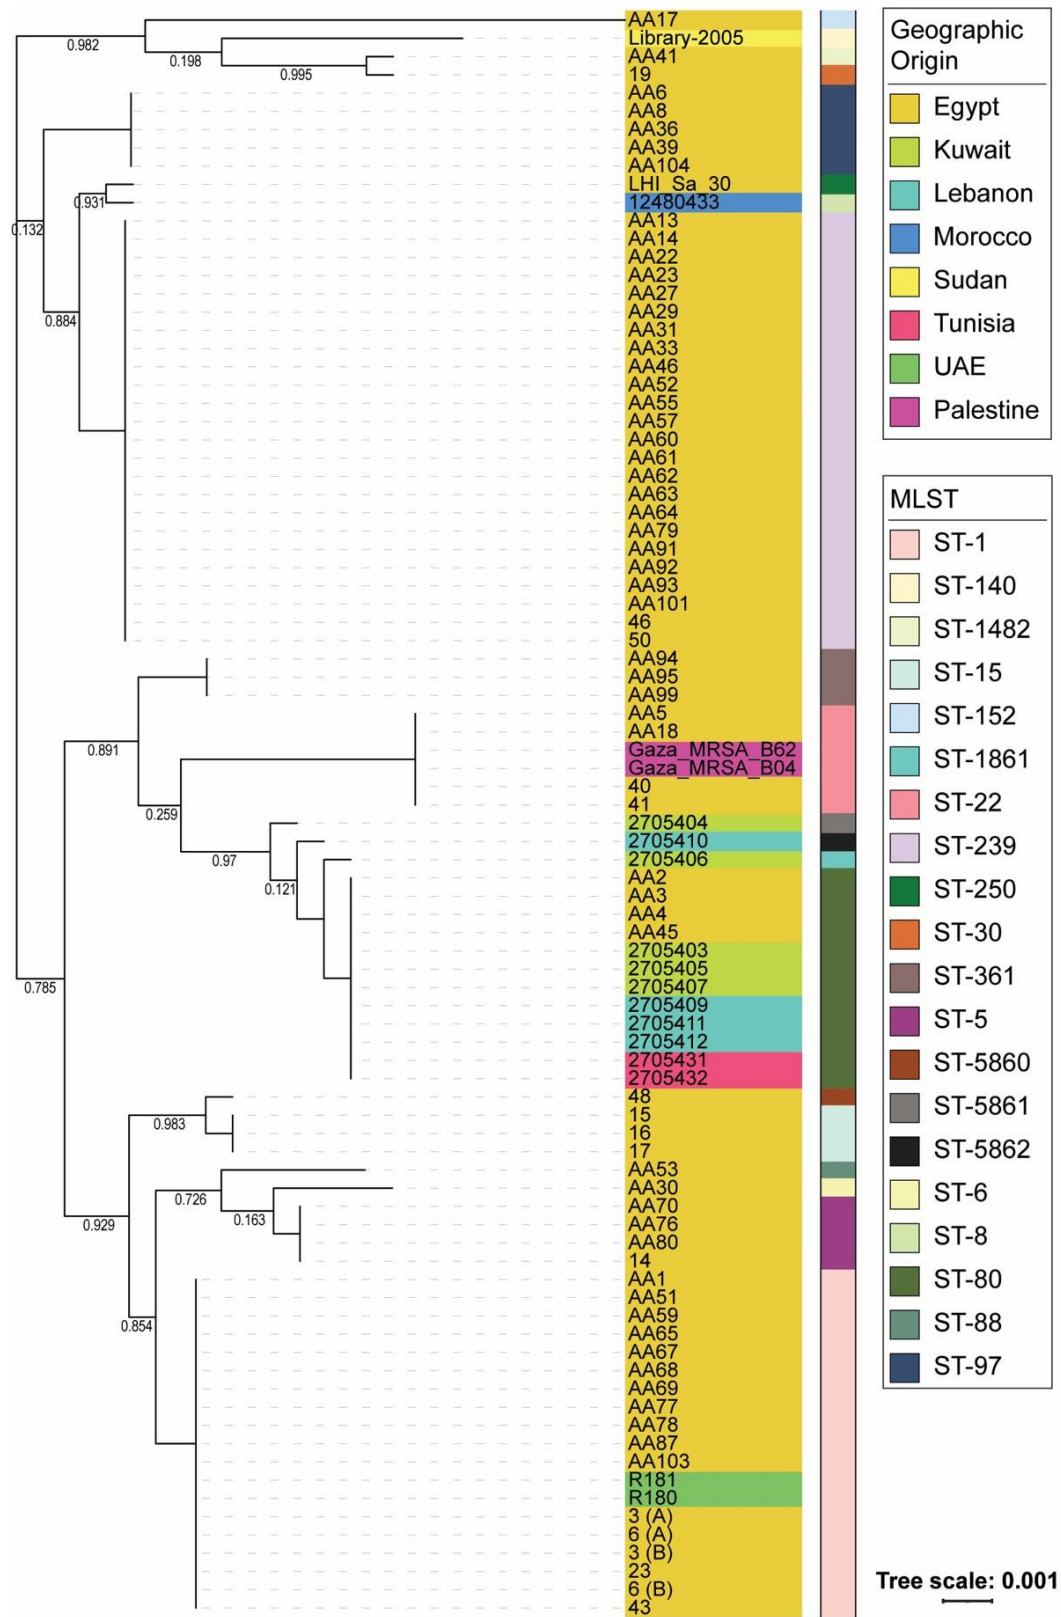

Figure S2. MLST tree of *S. aureus* annotated by geographic origin and MLST.
